# Supplementary material for: Seasonal parasitism and host specificity of Trissolcus japonicus in northern China
Source: PubMed Central journal article supplement (PMC5544787; doi:10.1007/s10340-017-0863-y), 2017-04-18
Supplement: 10340_2017_863_MOESM1_ESM.pdf [file 10340_2017_863_MOESM1_ESM.pdf]

| Host               | Location           | Collection period           | host plants                                            | # egg masses (#parasit.) | # eggs            | # nymphs emerg. | # dead eggs (no emerg.) | # parasitoids emerg. | Parasitoid species composition |                             |                            |                                |                       |                           |                      |                      |                       |                          |          |           |            |            |           |           |
|--------------------|--------------------|-----------------------------|--------------------------------------------------------|--------------------------|-------------------|-----------------|-------------------------|----------------------|--------------------------------|-----------------------------|----------------------------|--------------------------------|-----------------------|---------------------------|----------------------|----------------------|-----------------------|--------------------------|----------|-----------|------------|------------|-----------|-----------|
|                    |                    |                             |                                                        |                          |                   |                 |                         |                      | <i>Trissolcus japonicus</i>    | <i>Trissolcus cultratus</i> | <i>Trissolcus plautiae</i> | <i>Trissolcus semistriatus</i> | <i>Trissolcus sp.</i> | <i>Trissolcus tumidus</i> | <i>Telenomus sp.</i> | <i>Anastatus sp.</i> | <i>Ooencyrtus sp.</i> | <i>Acroclisoides sp.</i> |          |           |            |            |           |           |
| <i>H. halys</i>    | Langfang           | Jul-12                      | <i>Robinia pseudoacacia</i>                            | 17 (15)                  | 457               | 117             | 155                     | 185                  | 177                            | 0                           | 0                          | 0                              | 0                     | 0                         | 0                    | 8                    | 0                     | 0                        |          |           |            |            |           |           |
|                    |                    |                             | <i>Zizyphus jujuba</i>                                 | 6 (5)                    | 167               | 51              | 54                      | 62                   | 62                             | 0                           | 0                          | 0                              | 0                     | 0                         | 0                    | 0                    | 0                     | 0                        | 0        |           |            |            |           |           |
|                    |                    |                             | <i>Pyrus sorotina</i>                                  | 2 (2)                    | 56                | 24              | 8                       | 24                   | 11                             | 0                           | 0                          | 0                              | 0                     | 0                         | 0                    | 0                    | 13                    | 0                        | 0        |           |            |            |           |           |
|                    |                    |                             | <i>Boehmeria siamensis</i>                             | 4 (4)                    | 91                | 0               | 35                      | 56                   | 40                             | 0                           | 0                          | 0                              | 0                     | 0                         | 0                    | 0                    | 16                    | 0                        | 0        |           |            |            |           |           |
|                    | Haidian            | Jul-12                      | <i>Pyrus betulaeifolia</i>                             | 6 (6)                    | 145               | 58              | 34                      | 53                   | 32                             | 0                           | 0                          | 0                              | 0                     | 0                         | 0                    | 21                   | 0                     | 0                        |          |           |            |            |           |           |
|                    | Hengshui           | Jul-12                      | <i>Ulmus pumila</i>                                    | 2 (1)                    | 57                | 26              | 13                      | 18                   | 0                              | 18                          | 0                          | 0                              | 0                     | 0                         | 0                    | 0                    | 0                     | 0                        |          |           |            |            |           |           |
|                    |                    |                             | <i>Pyrus sorotina</i>                                  | 1 (1)                    | 14                | 0               | 7                       | 7                    | 7                              | 0                           | 0                          | 0                              | 0                     | 0                         | 0                    | 0                    | 0                     | 0                        |          |           |            |            |           |           |
|                    | Fragrant hill      | Jul-12                      | <i>Cotinus coggygria</i>                               | 5 (2)                    | 95                | 42              | 41                      | 12                   | 12                             | 0                           | 0                          | 0                              | 0                     | 0                         | 0                    | 0                    | 0                     | 0                        |          |           |            |            |           |           |
|                    | Beijing            | Jul-12                      | <i>Robinia pseudoacacia</i>                            | 3 (2)                    | 84                | 28              | 30                      | 26                   | 26                             | 0                           | 0                          | 0                              | 0                     | 0                         | 0                    | 0                    | 0                     | 0                        |          |           |            |            |           |           |
|                    | Lengquan           | May-13                      | <i>Prunus persica</i>                                  | 4 (3)                    | 113               | 26              | 30                      | 57                   | 39                             | 18                          | 0                          | 0                              | 0                     | 0                         | 0                    | 0                    | 0                     | 0                        |          |           |            |            |           |           |
|                    | Shengshuyuan       | Jun/Jul-13                  | <i>Prunus persica</i>                                  | 3 (3)                    | 84                | 0               | 43                      | 41                   | 41                             | 0                           | 0                          | 0                              | 0                     | 0                         | 0                    | 0                    | 0                     | 0                        |          |           |            |            |           |           |
|                    |                    |                             | <i>Morus alba</i>                                      | 9 (9)                    | 232               | 6               | 105                     | 121                  | 92                             | 0                           | 0                          | 0                              | 0                     | 4                         | 25                   | 0                    | 0                     | 0                        |          |           |            |            |           |           |
|                    | Langfang           | Jul-13                      | <i>Robinia pseudoacacia</i>                            | 40 (31)                  | 1,096             | 207             | 254                     | 635                  | 470                            | 150                         | 0                          | 0                              | 0                     | 0                         | 11                   | 4                    | 0                     | 0                        |          |           |            |            |           |           |
|                    | Baiwang Mt.        | Aug/Sep-14                  | <i>Robinia pseudoacacia</i>                            | 34 (21)                  | 699               | 61              | 275                     | 363                  | 206                            | 15                          | 0                          | 0                              | 0                     | 0                         | 0                    | 140                  | 2                     | 0                        |          |           |            |            |           |           |
|                    | Fragrant Hills     | Aug-14                      | <i>Robinia pseudoacacia</i>                            | 2 (0)                    | 19                | 0               | 19                      | 0                    | 0                              | 0                           | 0                          | 0                              | 0                     | 0                         | 0                    | 0                    | 0                     | 0                        |          |           |            |            |           |           |
|                    | Lengquan           | May/Jul-14                  | <i>Cotinus coggygria</i>                               | 1 (0)                    | 14                | 0               | 14                      | 0                    | 0                              | 0                           | 0                          | 0                              | 0                     | 0                         | 0                    | 0                    | 0                     | 0                        |          |           |            |            |           |           |
|                    |                    |                             | <i>Morus alba</i>                                      | 2 (1)                    | 52                | 26              | 5                       | 21                   | 0                              | 21                          | 0                          | 0                              | 0                     | 0                         | 0                    | 0                    | 0                     | 0                        |          |           |            |            |           |           |
|                    |                    |                             | <i>Prunus persica</i>                                  | 4 (2)                    | 101               | 45              | 32                      | 24                   | 24                             | 0                           | 0                          | 0                              | 0                     | 0                         | 0                    | 0                    | 0                     | 0                        |          |           |            |            |           |           |
|                    |                    |                             | <i>Prunus avium</i>                                    | 17 (13)                  | 458               | 25              | 214                     | 219                  | 171                            | 0                           | 0                          | 0                              | 0                     | 0                         | 9                    | 39                   | 0                     | 0                        |          |           |            |            |           |           |
|                    |                    |                             | <i>Zizyphus jujuba</i>                                 | 6 (5)                    | 149               | 22              | 36                      | 91                   | 60                             | 0                           | 0                          | 0                              | 0                     | 0                         | 0                    | 31                   | 0                     | 0                        |          |           |            |            |           |           |
| Miaofeng Mt.       | Aug-14             | <i>Robinia pseudoacacia</i> | 1 (1)                                                  | 27                       | 8                 | 12              | 7                       | 0                    | 0                              | 0                           | 0                          | 0                              | 0                     | 0                         | 7                    | 0                    | 0                     |                          |          |           |            |            |           |           |
| Sujiatuo village   | Jul-14             | <i>Prunus avium</i>         | 1 (0)                                                  | 28                       | 28                | 0               | 0                       | 0                    | 0                              | 0                           | 0                          | 0                              | 0                     | 0                         | 0                    | 0                    | 0                     |                          |          |           |            |            |           |           |
| Xishanlinyu        | Aug-14             | <i>Robinia pseudoacacia</i> | 4 (3)                                                  | 74                       | 0                 | 51              | 23                      | 11                   | 0                              | 0                           | 0                          | 0                              | 0                     | 0                         | 7                    | 5                    | 0                     |                          |          |           |            |            |           |           |
| Xiaojiaye          | Aug-14             | <i>Robinia pseudoacacia</i> | 1 (0)                                                  | 22                       | 0                 | 22              | 0                       | 0                    | 0                              | 0                           | 0                          | 0                              | 0                     | 0                         | 0                    | 0                    | 0                     |                          |          |           |            |            |           |           |
| Baiwang Mt.        | May/Jul-15         | <i>Robinia pseudoacacia</i> | 19 (13)                                                | 493                      | 151               | 239             | 103                     | 92                   | 0                              | 0                           | 0                          | 0                              | 0                     | 0                         | 11                   | 0                    | 0                     |                          |          |           |            |            |           |           |
| Langfang           | Jul-15             | <i>Zea mais</i>             | 40 (40)                                                | 1,062                    | 41                | 394             | 627                     | 588                  | 15                             | 0                           | 0                          | 0                              | 0                     | 14                        | 7                    | 3                    | 0                     |                          |          |           |            |            |           |           |
|                    |                    | <i>Morus nigra</i>          | 2 (2)                                                  | 55                       | 16                | 15              | 24                      | 0                    | 12                             | 0                           | 0                          | 0                              | 0                     | 0                         | 0                    | 12                   | 0                     |                          |          |           |            |            |           |           |
|                    |                    | <b>total</b>                | <b>236 (185)</b>                                       | <b>5944</b>              | <b>1008</b>       | <b>2137</b>     | <b>2799</b>             | <b>2161</b>          | <b>228</b>                     | <b>21</b>                   | <b>0</b>                   | <b>0</b>                       | <b>0</b>              | <b>38</b>                 | <b>329</b>           | <b>22</b>            | <b>0</b>              |                          |          |           |            |            |           |           |
| proportion (%)     |                    |                             |                                                        |                          |                   |                 |                         |                      | 77.2                           | 8.1                         | 0.8                        | 0                              | 0                     | 0                         | 1.3                  | 11.8                 | 0.8                   | 0                        |          |           |            |            |           |           |
| <i>P. crossata</i> | Lengquan           | May-13                      | <i>Morus alba</i>                                      | 152 (136)                | 1,855             | 205             | 427                     | 1223                 | 10                             | 0                           | 1122                       | 0                              | 0                     | 30                        | 60                   | 1                    | 0                     | 0                        |          |           |            |            |           |           |
|                    |                    |                             | Jun-13                                                 | <i>Morus alba</i>        | 150 (114)         | 2,088           | 150                     | 797                  | 1141                           | 105                         | 0                          | 758                            | 0                     | 0                         | 30                   | 29                   | 175                   | 8                        | 36       |           |            |            |           |           |
|                    |                    |                             | Jul-13                                                 | <i>Morus alba</i>        | 55 (44)           | 720             | 14                      | 390                  | 316                            | 100                         | 0                          | 34                             | 0                     | 0                         | 3                    | 157                  | 0                     | 22                       |          |           |            |            |           |           |
|                    | Shengshuyuan       | May-13                      | <i>Morus alba</i>                                      | 50 (40)                  | 731               | 131             | 236                     | 382                  | 132                            | 9                           | 190                        | 0                              | 0                     | 1                         | 41                   | 9                    | 0                     | 0                        |          |           |            |            |           |           |
|                    |                    |                             | Jun-13                                                 | <i>Morus alba</i>        | 283 (233)         | 3,975           | 298                     | 1,689                | 1,988                          | 272                         | 1                          | 995                            | 0                     | 0                         | 9                    | 382                  | 308                   | 9                        | 12       |           |            |            |           |           |
|                    |                    |                             | Jul-13                                                 | <i>Morus alba</i>        | 42 (24)           | 509             | 0                       | 418                  | 91                             | 0                           | 1                          | 0                              | 0                     | 0                         | 2                    | 84                   | 0                     | 4                        |          |           |            |            |           |           |
|                    | Lengquan           | May-14                      | <i>Morus alba</i>                                      | 38 (35)                  | 559               | 40              | 74                      | 445                  | 15                             | 0                           | 415                        | 0                              | 0                     | 8                         | 1                    | 6                    | 0                     | 0                        |          |           |            |            |           |           |
|                    |                    |                             | Sujiatuo village                                       | May-14                   | <i>Morus alba</i> | 88 (56)         | 1270                    | 363                  | 328                            | 9                           | 0                          | 636                            | 0                     | 0                         | 8                    | 0                    | 0                     | 0                        |          |           |            |            |           |           |
|                    | Yangtai Mt.        | Jun/Jul-15                  | <i>Morus alba</i>                                      | 14 (5)                   | 164               | 20              | 41                      | 103                  | 4                              | 0                           | 64                         | 0                              | 0                     | 0                         | 35                   | 0                    | 0                     |                          |          |           |            |            |           |           |
|                    | Lengquan           | Jun/Jul-15                  | <i>Morus alba</i>                                      | 14 (4)                   | 155               | 14              | 79                      | 65                   | 10                             | 0                           | 33                         | 0                              | 0                     | 1                         | 13                   | 0                    | 8                     |                          |          |           |            |            |           |           |
|                    | Baiwang Mt.        | May-15                      | <i>R. pseudoacacia</i>                                 | 5 (3)                    | 73                | 33              | 10                      | 30                   | 13                             | 14                          | 0                          | 0                              | 0                     | 0                         | 3                    | 0                    | 0                     |                          |          |           |            |            |           |           |
|                    | total              |                             |                                                        |                          |                   |                 |                         |                      |                                | <b>891 (694)</b>            | <b>11,707</b>              | <b>1268</b>                    | <b>4359</b>           | <b>6,437</b>              | <b>670</b>           | <b>24</b>            | <b>4248</b>           | <b>0</b>                 | <b>0</b> | <b>70</b> | <b>534</b> | <b>786</b> | <b>23</b> | <b>82</b> |
|                    | proportion (%)     |                             |                                                        |                          |                   |                 |                         |                      |                                | 10.41                       | 0.37                       | 65.99                          | 0.00                  | 0.00                      | 1.09                 | 8.29                 | 12.21                 | 0.37                     | 1.27     |           |            |            |           |           |
|                    | <i>C. tibialis</i> | Baiwang Mt.                 | Aug-14                                                 | <i>R. pseudoacacia</i>   | 17 (10)           | 267             | 28                      | 206                  | 33                             | 0                           | 7                          | 0                              | 0                     | 7                         | 0                    | 0                    | 18                    | 0                        | 1        |           |            |            |           |           |
| May-Jul-15         |                    |                             |                                                        | <i>R. pseudoacacia</i>   | 54 (20)           | 841             | 442                     | 208                  | 191                            | 0                           | 0                          | 0                              | 0                     | 130                       | 9                    | 0                    | 52                    | 0                        | 0        |           |            |            |           |           |
| <b>total</b>       |                    |                             |                                                        | <b>71 (30)</b>           | <b>1108</b>       | <b>470</b>      | <b>414</b>              | <b>224</b>           | <b>0</b>                       | <b>7</b>                    | <b>0</b>                   | <b>0</b>                       | <b>137</b>            | <b>9</b>                  | <b>0</b>             | <b>70</b>            | <b>0</b>              | <b>1</b>                 |          |           |            |            |           |           |
| proportion (%)     |                    |                             |                                                        |                          |                   |                 |                         |                      | 0                              | 3.13                        | 0                          | 0                              | 61.16                 | 4.02                      | 0                    | 31.25                | 0                     | 0.44                     |          |           |            |            |           |           |
| <i>D. baccarum</i> | Langfang           | Jul-12                      | <i>Boehmeria siamensis</i> ,<br><i>R. pseudoacacia</i> | 18 (5)                   | 502               | 298             | 84                      | 120                  | 108                            | 0                           | 0                          | 0                              | 0                     | 0                         | 2                    | 0                    | 10                    | 0                        |          |           |            |            |           |           |
|                    |                    |                             | Jul-15                                                 | <i>Z. mays</i>           | 13 (10)           | 291             | 161                     | 38                   | 92                             | 60                          | 0                          | 0                              | 32                    | 0                         | 0                    | 0                    | 0                     | 0                        | 0        |           |            |            |           |           |
|                    |                    |                             | <b>total</b>                                           | <b>31 (15)</b>           | <b>793</b>        | <b>459</b>      | <b>122</b>              | <b>212</b>           | <b>168</b>                     | <b>0</b>                    | <b>0</b>                   | <b>32</b>                      | <b>0</b>              | <b>0</b>                  | <b>2</b>             | <b>0</b>             | <b>10</b>             | <b>0</b>                 |          |           |            |            |           |           |

|                     |          |        |                        |       |    |    |                |       |   |   |       |   |   |      |     |      |   |
|---------------------|----------|--------|------------------------|-------|----|----|----------------|-------|---|---|-------|---|---|------|-----|------|---|
|                     |          |        |                        |       |    |    | proportion (%) | 79.25 | 0 | 0 | 15.09 | 0 | 0 | 0.94 | 0   | 4.72 | 0 |
| <i>A. chinensis</i> | Langfang | Jul-12 | <i>Zizyphus jujuba</i> | 2 (1) | 30 | 24 | 0              | 6     | 0 | 0 | 0     | 0 | 0 | 0    | 6   | 0    | 0 |
|                     |          |        |                        |       |    |    | proportion (%) | 0     | 0 | 0 | 0     | 0 | 0 | 0    | 100 | 0    | 0 |
