# Supplementary material for: Seasonal parasitism and host specificity of Trissolcus japonicus in northern China
Source: PubMed Central journal article supplement (PMC5544787; doi:10.1007/s10340-017-0863-y), 2017-04-18
Supplement: 10340_2017_863_MOESM2_ESM.pdf [file 10340_2017_863_MOESM2_ESM.pdf]

Parasitoid species composition

| Non-target species        | Location         | Exposure month | # egg masses exposed /recollected | # eggs taken into rearing | # em. nymphs | # dead eggs | # parasitoids emerged | % total parasitism | <i>Trissolcus japonicus</i> | <i>Trissolcus cultratus</i> | <i>Trissolcus plautiae</i> | <i>Trissolcus tumidus</i> | <i>Telenomus</i> sp. | <i>Anastatus</i> sp. | <i>Ooencyrtus</i> sp. | <i>Acroclisoides</i> sp. |
|---------------------------|------------------|----------------|-----------------------------------|---------------------------|--------------|-------------|-----------------------|--------------------|-----------------------------|-----------------------------|----------------------------|---------------------------|----------------------|----------------------|-----------------------|--------------------------|
| <i>Menida violacea</i>    | Lengquan village | June           | 49/47                             | 668                       | 152          | 144         | 372                   | 55.7               | 278                         | 0                           | 75                         | 6                         | 12                   | 1                    | 0                     | 0                        |
|                           |                  | July           | 36/35                             | 498                       | 278          | 119         | 101                   | 20.3               | 76                          | 0                           | 0                          | 0                         | 7                    | 18                   | 0                     | 0                        |
|                           | Beianhe village  | July           | 11/11                             | 144                       | 44           | 48          | 52                    | 36.1               | 45                          | 0                           | 0                          | 0                         | 6                    | 1                    | 0                     | 0                        |
|                           | Yangtai Mountain | June/July      | 10/10                             | 138                       | 75           | 37          | 26                    | 18.8               | 14                          | 0                           | 0                          | 0                         | 0                    | 12                   | 0                     | 0                        |
|                           | Sujiatuo village | June/July      | 11/10                             | 141                       | 74           | 55          | 12                    | 8.5                | 6                           | 0                           | 0                          | 0                         | 0                    | 0                    | 6                     | 0                        |
|                           | Fragrant Hills   | June-Aug.      | 12/12                             | 167                       | 137          | 17          | 13                    | 7.8                | 13                          | 0                           | 0                          | 0                         | 0                    | 0                    | 0                     | 0                        |
|                           | Baiwang Mountain | May-Aug.       | 15/13                             | 178                       | 98           | 63          | 11                    | 6.2                | 7                           | 4                           | 0                          | 0                         | 0                    | 0                    | 0                     | 0                        |
|                           |                  | Σ              | 144/138                           | 1,934                     | 858          | 483         | 587                   | 30.4               | 439                         | 4                           | 75                         | 6                         | 25                   | 32                   | 6                     | 0                        |
|                           |                  |                |                                   |                           |              |             |                       | %                  | 74.8                        | 0.7                         | 12.8                       | 1                         | 4.3                  | 5.5                  | 1                     | 0                        |
| <i>Dolycoris baccarum</i> | Lengquan village | June/July      | 42/42                             | 1,114                     | 333          | 634         | 149                   | 13.4               | 105                         | 0                           | 2                          | 0                         | 24                   | 15                   | 3                     | 0                        |
|                           | Beianhe village  | June/July      | 8/8                               | 179                       | 10           | 85          | 84                    | 46.9               | 42                          | 0                           | 0                          | 12                        | 20                   | 10                   | 0                     | 0                        |
|                           | Yangtai Mountain | June/July      | 2/2                               | 42                        | 41           | 1           | 0                     | 0                  | 0                           | 0                           | 0                          | 0                         | 0                    | 0                    | 0                     | 0                        |
|                           | Sujiatuo village | June/July      | 4/4                               | 115                       | 63           | 52          | 0                     | 0                  | 0                           | 0                           | 0                          | 0                         | 0                    | 0                    | 0                     | 0                        |
|                           | Fragrant Hills   | June/July      | 7/6                               | 168                       | 67           | 101         | 0                     | 0                  | 0                           | 0                           | 0                          | 0                         | 0                    | 0                    | 0                     | 0                        |
|                           | Baiwang Mountain | Jun/July/Sep.  | 9/8                               | 140                       | 69           | 71          | 0                     | 0                  | 0                           | 0                           | 0                          | 0                         | 0                    | 0                    | 0                     | 0                        |
|                           |                  | Σ              | 72/70                             | 1,758                     | 583          | 944         | 233                   | 13.3               | 147                         | 0                           | 2                          | 12                        | 44                   | 25                   | 3                     | 0                        |
|                           |                  |                |                                   |                           |              |             |                       | %                  | 63.1                        | 0                           | 0.9                        | 5.2                       | 18.9                 | 10.7                 | 1.2                   | 0                        |
| <i>Carbula eoa</i>        | Lengquan village | Aug.           | 32/32                             | 430                       | 219          | 100         | 111                   | 25.8               | 42                          | 42                          | 0                          | 0                         | 14                   | 0                    | 13                    | 0                        |
|                           | Beianhe village  | Sep.           | 5/5                               | 64                        | 51           | 13          | 0                     | 0                  | 0                           | 0                           | 0                          | 0                         | 0                    | 0                    | 0                     | 0                        |
|                           | Yangtai Mountain | Aug.           | 6/6                               | 80                        | 59           | 21          | 0                     | 0                  | 0                           | 0                           | 0                          | 0                         | 0                    | 0                    | 0                     | 0                        |
|                           | Baiwang Mountain | Sep.           | 6/6                               | 84                        | 14           | 19          | 51                    | 60.7               | 0                           | 0                           | 0                          | 0                         | 0                    | 5                    | 46                    | 0                        |
|                           |                  | Σ              | 49/49                             | 658                       | 343          | 153         | 162                   | 24.6               | 42                          | 42                          | 0                          | 0                         | 14                   | 5                    | 59                    | 0                        |
|                           |                  |                |                                   |                           |              |             |                       | %                  | 25.9                        | 25.9                        | 0                          | 0                         | 8.6                  | 3.1                  | 36.4                  | 0                        |
| <i>Halyomorpha halys</i>  | Lengquan village | March          | 6/5                               | 140                       | 58           | 82          | 0                     | 0                  | 0                           | 0                           | 0                          | 0                         | 0                    | 0                    | 0                     | 0                        |
|                           |                  | April          | 28/23                             | 620                       | 475          | 145         | 0                     | 0                  | 0                           | 0                           | 0                          | 0                         | 0                    | 0                    | 0                     | 0                        |
|                           |                  | May            | 31/24                             | 320                       | 171          | 77          | 72                    | 22.5               | 72                          | 0                           | 0                          | 0                         | 0                    | 0                    | 0                     | 0                        |
|                           |                  | June           | 30/28                             | 354                       | 77           | 147         | 130                   | 36.7               | 130                         | 0                           | 0                          | 0                         | 0                    | 0                    | 0                     | 0                        |
|                           |                  | July           | 80/78                             | 647                       | 170          | 203         | 274                   | 42.4               | 274                         | 0                           | 0                          | 0                         | 0                    | 0                    | 0                     | 0                        |
|                           |                  | Aug            | 37/37                             | 433                       | 49           | 126         | 258                   | 59.6               | 233                         | 20                          | 0                          | 0                         | 0                    | 0                    | 5                     | 0                        |

|                  |        |          |         |      |      |      |      |             |              |             |             |             |             |             |             |             |
|------------------|--------|----------|---------|------|------|------|------|-------------|--------------|-------------|-------------|-------------|-------------|-------------|-------------|-------------|
| Beianhe village  | Sep.   | 1/1      | 28      | 9    | 19   | 0    | 0    | 0           | 0            | 0           | 0           | 0           | 0           | 0           | 0           |             |
|                  | May    | 15/14    | 195     | 154  | 41   | 0    | 0    | 0           | 0            | 0           | 0           | 0           | 0           | 0           | 0           |             |
|                  | June   | 16/16    | 200     | 0    | 32   | 168  | 84   | 158         | 9            | 0           | 0           | 1           | 0           | 0           | 0           |             |
|                  | July   | 6/5      | 51      | 0    | 1    | 50   | 98   | 50          | 0            | 0           | 0           | 0           | 0           | 0           | 0           |             |
| Yantai Mountain  | Aug    | 2/2      | 26      | 0    | 1    | 25   | 96.2 | 0           | 25           | 0           | 0           | 0           | 0           | 0           | 0           |             |
|                  | May    | 14/13    | 162     | 34   | 120  | 8    | 4.9  | 2           | 0            | 6           | 0           | 0           | 0           | 0           | 0           |             |
|                  | June   | 8/6      | 108     | 50   | 31   | 27   | 25   | 27          | 0            | 0           | 0           | 0           | 0           | 0           | 0           |             |
|                  | July   | 8/7      | 82      | 0    | 56   | 26   | 31.7 | 0           | 0            | 0           | 0           | 0           | 26          | 0           | 0           |             |
| Sujiatuo village | Aug    | 3/3      | 17      | 14   | 3    | 0    | 0    | 0           | 0            | 0           | 0           | 0           | 0           | 0           | 0           |             |
|                  | May    | 14/13    | 183     | 28   | 55   | 100  | 54.6 | 78          | 20           | 0           | 0           | 0           | 0           | 2           | 0           |             |
|                  | June   | 16/15    | 190     | 88   | 77   | 25   | 13.2 | 25          | 0            | 0           | 0           | 0           | 0           | 0           | 0           |             |
| Fragrant Hills   | July   | 8/8      | 105     | 27   | 37   | 41   | 39.1 | 8           | 0            | 33          | 0           | 0           | 0           | 0           | 0           |             |
|                  | May    | 8/5      | 56      | 28   | 28   | 0    | 0    | 0           | 0            | 0           | 0           | 0           | 0           | 0           | 0           |             |
|                  | June   | 13/13    | 165     | 93   | 72   | 0    | 0    | 0           | 0            | 0           | 0           | 0           | 0           | 0           | 0           |             |
|                  | July   | 12/12    | 154     | 45   | 67   | 42   | 27.3 | 37          | 5            | 0           | 0           | 0           | 0           | 0           | 0           |             |
| Baiwang Mountain | August | 9/9      | 91      | 0    | 13   | 78   | 85.7 | 78          | 0            | 0           | 0           | 0           | 0           | 0           | 0           |             |
|                  | May    | 14/10    | 56      | 25   | 3    | 0    | 0    | 0           | 0            | 0           | 0           | 0           | 0           | 0           | 0           |             |
|                  | June   | 21/21    | 187     | 38   | 16   | 133  | 71.1 | 132         | 0            | 0           | 0           | 0           | 1           | 0           | 0           |             |
|                  | July   | 20/19    | 265     | 0    | 42   | 223  | 84.2 | 209         | 0            | 0           | 0           | 0           | 10          | 4           | 0           |             |
|                  |        | $\Sigma$ | 420/387 | 4835 | 1633 | 1494 | 1680 | <b>34.7</b> | 1513         | 79          | 39          | 0           | 1           | 42          | 6           | 0           |
|                  |        |          |         |      |      |      |      | %           | <b>90.06</b> | <b>4.70</b> | <b>2.32</b> | <b>0.00</b> | <b>0.06</b> | <b>2.50</b> | <b>0.36</b> | <b>0.00</b> |
